# Supplementary material for: A new, reliable, and high-throughput strategy to screen bacteria for antagonistic activity against Staphylococcus aureus
Source: PubMed Central journal article supplement (PMC8228506; doi:10.1186/s12866-021-02265-4), 2021-06-24
Supplement: 12866_2021_2265_MOESM1_ESM.pdf [file 12866_2021_2265_MOESM1_ESM.pdf]

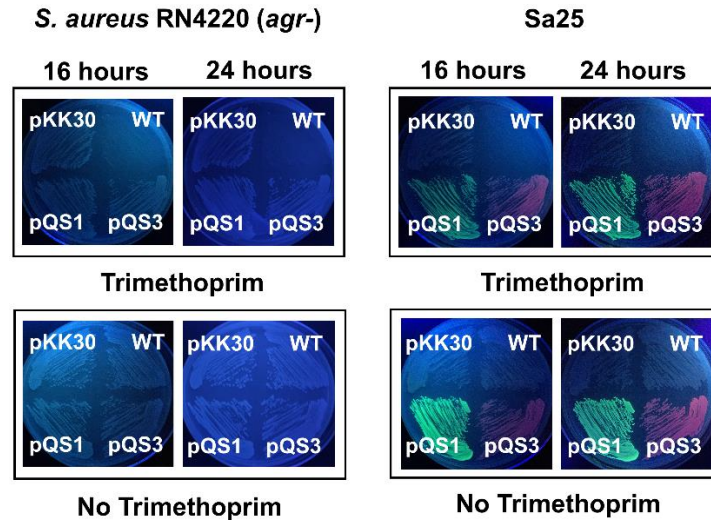

**Figure S1. Expression of the reporter protein in agr defective and positive strains.** Two plasmids pQS1 and pQS3 were transformed to *S. aureus* RN4220 (*agr*<sup>-</sup>) and Sa25. After 24 hours of incubation either with or without trimethoprim, no fluorescent colony was observed from the transformants of *S. aureus* RN4220, while the transformants of *S. aureus* Sa25 exhibited clear fluorescent phenotypes.

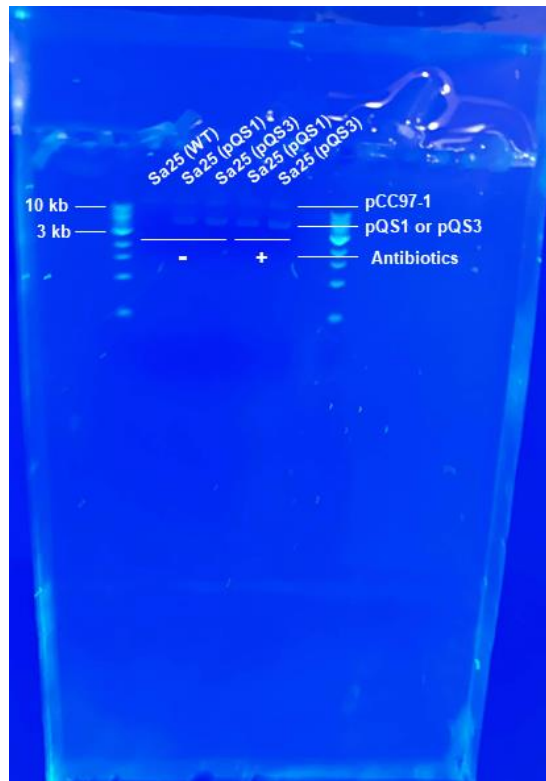

**Figure S2. Agarose gel electrophoresis of plasmid DNA.** The first lane contains a single DNA band of pCC97-1. Other lands contain two DNA bands corresponding to pCC97-1 and pQS plasmids indicating the co-existence of two plasmids in the same *S. aureus* cells.
