# Supplementary material for: A new, reliable, and high-throughput strategy to screen bacteria for antagonistic activity against Staphylococcus aureus
Source: PubMed Central journal article supplement (PMC8228506; doi:10.1186/s12866-021-02265-4), 2021-06-24
Supplement: 12866_2021_2265_MOESM2_ESM.pdf [file 12866_2021_2265_MOESM2_ESM.pdf]

**Table S1.** Bacteria used in screening antagonistic bacteria using the pQS-based methods and their growth-inhibiting (GI) and quorum-quenching (QQ) activity toward *S. aureus*

| Test No. | Bacteria                                                  | Sa25 (CC97)   | Sa27 (CC151) |
|----------|-----------------------------------------------------------|---------------|--------------|
| 1        | <i>Lactococcus lactis</i> subsp. <i>lactis</i> ATCC 11454 | GI            | GI           |
| 3        | <i>Staphylococcus epidermidis</i> ATCC 14990              | QQ (variable) |              |
| 5        | <i>Staphylococcus aureus</i> (Sa25)                       |               | GI           |
| 6        | <i>Staphylococcus aureus</i> (Sa27)                       | QQ            |              |
| 7        | <i>Bacillus pumilus</i>                                   | GI            | GI           |
| 8        | <i>Bacillus altitudinis</i>                               | GI            | GI           |
| 9        | <i>Bacillus paralicheniformis</i>                         |               |              |
| 10       | <i>Bacillus licheniformis</i>                             |               |              |
| 11       | <i>Bacillus subtilis</i>                                  | GI            | GI           |
| 12       | <i>Staphylococcus pasteurii</i>                           | QQ            |              |
| 13       | <i>Staphylococcus hominis</i>                             | QQ            |              |
| 14       | <i>Staphylococcus saprophyticus</i>                       | QQ            |              |
| 15       | <i>Staphylococcus chromogenes</i>                         | QQ            | QQ           |
| 16       | <i>Staphylococcus vitulinus</i>                           |               |              |
| 17       | <i>Staphylococcus haemolyticus</i>                        |               |              |
| 18       | <i>Staphylococcus gallinarum</i>                          | QQ            | QQ           |
| 19       | <i>Staphylococcus cohnii</i>                              |               |              |
| 20       | <i>Staphylococcus xylosus</i>                             |               |              |
| 21       | <i>Staphylococcus hyicus</i>                              | QQ            |              |
| 22       | <i>Staphylococcus simulans</i>                            | QQ            | QQ           |
| 23       | <i>Staphylococcus epidermidis</i>                         |               |              |
| 24       | <i>Staphylococcus sciuri</i>                              |               |              |
| 25       | <i>Staphylococcus capitis</i>                             |               |              |
| 26       | <i>Staphylococcus arlettae</i>                            | QQ            | QQ           |
| 27       | <i>Staphylococcus warneri</i>                             | QQ            |              |
| 28       | <i>Staphylococcus equorum</i>                             | QQ            | QQ           |
| 29       | <i>Staphylococcus succinus</i>                            | QQ            |              |
| 30       | <i>Staphylococcus hominis</i>                             |               |              |
| 31       | <i>Staphylococcus devriesei</i>                           | QQ            | QQ           |
| 32       | <i>Aerococcus viridans</i>                                | GI            | GI           |
| 33       | <i>Rothia aerolata</i>                                    |               |              |
| 34       | <i>Corynebacterium frankenforstense</i>                   |               |              |
| 38       | <i>Pantoea species</i>                                    |               |              |
| 43       | <i>Staphylococcus chromogenes</i>                         | QQ            | QQ           |
| 44       | <i>Staphylococcus caprae</i>                              | QQ            |              |
| 45       | <i>Staphylococcus saprophyticus</i>                       | QQ            | QQ           |
| 46       | <i>Staphylococcus haemolyticus</i>                        |               |              |
| 50       | <i>Bacillus species</i>                                   |               |              |
| 51       | <i>Bacillus licheniformis</i>                             |               |              |
| 53       | <i>Staphylococcus chromogenes</i>                         | QQ            | QQ           |
| 54       | <i>Staphylococcus chromogenes</i>                         | QQ            | QQ           |

---

|    |                                     |    |    |
|----|-------------------------------------|----|----|
| 55 | <i>Bacillus licheniformis</i>       |    |    |
| 56 | <i>Bacillus licheniformis</i>       |    |    |
| 57 | <i>Staphylococcus haemolyticus</i>  |    |    |
| 58 | <i>Staphylococcus chromogenes</i>   | QQ | QQ |
| 59 | <i>Bacillus licheniformis</i>       |    |    |
| 60 | <i>Staphylococcus chromogenes</i>   | QQ | QQ |
| 61 | <i>Staphylococcus saprophyticus</i> | QQ |    |
| 62 | <i>Bacillus licheniformis</i>       |    |    |
| 63 | <i>Bacillus subtilis</i>            | GI | GI |
| 64 | <i>Staphylococcus saprophyticus</i> | QQ |    |
| 65 | <i>Bacillus species</i>             | GI | GI |
| 66 | <i>Staphylococcus saprophyticus</i> | QQ |    |
| 67 | <i>Staphylococcus saprophyticus</i> | QQ |    |
| 68 | <i>Bacillus licheniformis</i>       | QQ |    |
| 69 | <i>Bacillus pumilus</i>             | GI | GI |
| 70 | <i>Bacillus pumilus</i>             | GI | GI |
| 71 | <i>Staphylococcus pasteurii</i>     | QQ |    |
| 72 | <i>Bacillus pumilus</i>             | GI | GI |
| 73 | <i>Staphylococcus hominis</i>       |    |    |
| 74 | <i>Pantoea species</i>              |    |    |
| 75 | <i>Bacillus pumilus</i>             | GI | GI |
| 76 | <i>Staphylococcus saprophyticus</i> | QQ |    |
| 77 | <i>Bacillus pumilus</i>             | GI | GI |
| 78 | <i>Bacillus species</i>             |    |    |
| 79 | <i>Staphylococcus chromogenes</i>   | QQ | QQ |
| 80 | <i>Rothia aerolata</i>              | QQ |    |
| 81 | <i>Rothia aerolata</i>              |    |    |
| 82 | <i>Rothia aerolata</i>              |    |    |
| 83 | Unknown1                            | GI | GI |
| 84 | <i>Bacillus pumilus</i>             | GI | GI |
| 85 | <i>Bacillus licheniformis</i>       |    |    |
| 86 | <i>Bacillus licheniformis</i>       |    |    |
| 87 | <i>Staphylococcus pasteurii</i>     | QQ |    |
| 88 | <i>Staphylococcus saprophyticus</i> | QQ |    |
| 89 | <i>Staphylococcus saprophyticus</i> | QQ |    |
| 90 | <i>Bacillus licheniformis</i>       |    |    |
| 91 | <i>Bacillus licheniformis</i>       |    |    |
| 92 | <i>Bacillus licheniformis</i>       |    |    |
| 93 | Unknown2                            | QQ |    |
| 94 | <i>Staphylococcus vitulinus</i>     |    |    |
| 95 | <i>Bacillus licheniformis</i>       |    |    |
| 96 | <i>Bacillus licheniformis</i>       |    |    |
| 97 | Unknown3                            | QQ |    |
| 98 | Unknown4                            |    |    |

---
